# Supplementary material for: A UAV-based sampling system to analyse greenhouse gases and volatile organic carbons encompassing compound specific stable isotope analysis
Source: Copernicus journal article supplement (doi:10.5194/egusphere-2022-830), 2022-09-29
Supplement: Supplementary file 1 [file egusphere-2022-830-supplement.pdf]

# A UAV-based sampling system to analyse greenhouse gases and volatile organic carbons encompassing compound specific stable isotope analysis

Simon Leitner<sup>1</sup>, Wendelin Feichtinger<sup>2</sup>, Stefan Mayer<sup>2</sup>, Florian Mayer<sup>2</sup>, Dustin Krompetz<sup>3</sup>, Rebecca Hood-Nowotny<sup>1</sup>, and Andrea Watzinger<sup>1</sup>

<sup>1</sup>University of Natural Resources and Life Sciences, Vienna, Institute of Soil Research, Tulln, Austria

<sup>2</sup>Combinnotec GmbH, Alland, Austria

<sup>3</sup>M3 Consulting Group, LLC, DBA M3 Agriculture Technologies, Phoenix, Arizona, United States

*Correspondence to:* Simon Leitner (simon.leitner@boku.ac.at)

## 10 Supplementary Material

**Table S1. Technical description of the Hermes V2**

|                                      |                                                 |
|--------------------------------------|-------------------------------------------------|
| Climb Rate                           | 2.5 m/s                                         |
| Decent Rate                          | 2.0 m/s                                         |
| Horizontal Velocity                  | 0 - 12 m/s                                      |
| Max Operating Altitude               | Line of Sight                                   |
| Max Takeoff Mass                     | 12.25 kg                                        |
| Empty Mass                           | 5.45 kg                                         |
| Ready to Fly Mass                    | 7.25 kg                                         |
| Dimensions of Airframe               | 1500 mm (width) 1500 mm (depth) 635 mm (height) |
| Est Usable Time Aloft (Zero Payload) | 23 Minutes (22 vDC RTL)                         |
| Est Usable Time Aloft (Max Payload)  | 8 Minutes (22 vDC RTL)                          |
| Max Wind                             | 37 kph                                          |

t-Test of peak area values per injection volume obtained by the analysis via thermal desorption or purge and trap autosampling

- 15 Table S2 Student-t-Test of mean values of injection volume specific peak area values obtained from TD and purge and trap (p&t) measurements for chlorinated ethenes within the liquid calibration standard (SD = standard deviation).

| <b>Compound</b> | <b>Peak Area<sub>mean</sub></b> | <b>Peak Area<sub>SD</sub></b> | <b>Method</b> | <b>p-value</b> |
|-----------------|---------------------------------|-------------------------------|---------------|----------------|
| cDCE            | 2.53                            | 0.04                          | p&t           | 1.0            |
| cDCE            | 2.97                            | 0.34                          | TD            |                |
| PCE             | 2.29                            | 0.02                          | p&t           | 0.3            |
| PCE             | 2.25                            | 0.27                          | TD            |                |
| TCE             | 2.48                            | 0.01                          | p&t           | 1.0            |
| TCE             | 2.77                            | 0.34                          | TD            |                |
| tDCE            | 2.25                            | 0.07                          | p&t           | 1.0            |
| tDCE            | 2.41                            | 0.23                          | TD            |                |
